# Supplementary material
Source: PubMed Central journal article supplement (PMC4026501)
Supplement: 11606_2014_2784_MOESM1_ESM.pdf [file 11606_2014_2784_MOESM1_ESM.pdf]

Appendix 1: International Classification of Diseases, 9<sup>th</sup> Revision (ICD-9) Codes

| Mental Health Condition               | ICD-9 Codes                                                                                                                                                                                                                                                 |
|---------------------------------------|-------------------------------------------------------------------------------------------------------------------------------------------------------------------------------------------------------------------------------------------------------------|
| Anxiety Disorders                     | 300.0x Anxiety disorders<br>300.1x Dissociative, conversion and factitious disorders<br>300.2x Phobic disorders<br>300.3x Obsessive-compulsive disorders                                                                                                    |
| Bipolar Disorder                      | 296.0x-296.1x<br>296.4x-296.9x                                                                                                                                                                                                                              |
| Major Depression                      | 296.2x-296.3x<br>296.82 Atypical depressive disorder<br>300.4 Dysthymic disorder<br>311 Depressive disorder, not elsewhere classified                                                                                                                       |
| Post Traumatic Stress Disorder (PTSD) | 309.81                                                                                                                                                                                                                                                      |
| Schizophrenia                         | 295.x                                                                                                                                                                                                                                                       |
| Other Psychotic disorders             | 298.0 Depressive type psychosis<br>298.1 Excitatory type psychosis<br>298.4 Psychogenic paranoid psychosis<br>298.8 Other and unspecified reactive psychosis<br>298.9 Unspecified psychosis<br>297.1 Shared psychotic disorder<br>297.3 Delusional disorder |

Appendix 2: Characteristics of patients with GAF scores and missing GAF scores, among experienced warfarin users with mental health conditions (N=28,216)

| Variables                                   | GAF Available<br>N=13,628<br>% | GAF Missing<br>N=14,588<br>% |
|---------------------------------------------|--------------------------------|------------------------------|
| % of patients with any outpatient MHC visit | 99.4                           | 93.7                         |
| Female Gender                               | 3.5                            | 2.7                          |
| Age Group                                   |                                |                              |
| 20-54                                       | 16.1                           | 8.2                          |
| 55-59                                       | 23.9                           | 14.2                         |
| 60-64                                       | 17.8                           | 14.1                         |
| 65-69                                       | 8.7                            | 10.8                         |
| 70-74                                       | 10.2                           | 13.9                         |
| 75+                                         | 23.3                           | 38.7                         |
| Race/Ethnicity                              |                                |                              |
| Non-Hispanic White                          | 81.7                           | 85.9                         |
| Non-Hispanic Black                          | 11.4                           | 8.8                          |
| Others                                      | 6.9                            | 5.3                          |
| Primary Indication for Warfarin*            |                                |                              |
| Atrial Fibrillation                         | 52.2                           | 59.6                         |
| Venous Thromboembolism                      | 39.3                           | 31.7                         |
| All Others Combined                         | 8.5                            | 8.7                          |
| Date of Warfarin Inception                  |                                |                              |
| >= 6 months before study inception          | 68.2                           | 72.1                         |
| 6 months before study - First year of study | 27.0                           | 23.6                         |
| Second year of the study                    | 4.9                            | 4.3                          |
| Comorbid Conditions                         |                                |                              |
| Cancer (newly diagnosed)                    | 6.5                            | 7.9                          |
| Chronic Kidney Disease                      | 13.3                           | 15.7                         |
| Chronic Liver Disease                       | 2.1                            | 1.3                          |
| Chronic Lung Disease                        | 36.0                           | 35.8                         |
| Diabetes                                    | 43.4                           | 41.2                         |
| Epilepsy                                    | 5.3                            | 4.0                          |
| Heart Failure                               | 32.0                           | 37.1                         |
| Dementia                                    | 9.8                            | 8.7                          |
| Alcohol Abuse                               | 22.7                           | 11.8                         |
| Substance Abuse (non-Alcohol)               | 14.4                           | 5.5                          |

GAF: Global Assessment of Function

Appendix 3

Table 1: Distribution of mental health conditions

|                     | % of those with MHCs | % of total population |
|---------------------|----------------------|-----------------------|
| Any MHC             | ---                  | 27.2                  |
| Anxiety disorders   | 28.8                 | 7.8                   |
| Bipolar             | 8.6                  | 2.3                   |
| Depression          | 69.4                 | 18.8                  |
| PTSD                | 26.8                 | 7.3                   |
| Schizophrenia       | 3.9                  | 1.1                   |
| Psychotic disorders | 7.1                  | 1.9                   |

MHC: Mental Health Condition

PTSD: Post-Traumatic Stress Disorder

Table 2: Distribution of comorbid mental health diagnoses

|                   | Bipolar<br>(%*) | Depression<br>(%) | PTSD<br>(%)    | Schizophrenia<br>(%) | Other<br>Psychotic<br>disorders<br>(%) |
|-------------------|-----------------|-------------------|----------------|----------------------|----------------------------------------|
| Anxiety disorders | 628<br>(0.6)    | 4,340<br>(4.2)    | 1,628<br>(1.6) | 206<br>(0.2)         | 353<br>(0.3)                           |
| Bipolar           | ---             | 1,312<br>(1.3)    | 679<br>(0.7)   | 200<br>(0.2)         | 163<br>(0.2)                           |
| Depression        | ---             | ---               | 4,285<br>(4.1) | 429<br>(0.4)         | 807<br>(0.8)                           |
| PTSD              | ---             | ---               | ---            | 229<br>(0.2)         | 312<br>(0.3)                           |
| Schizophrenia     | ---             | ---               | ---            | ---                  | 168<br>(0.2)                           |

\* Percentage of total study population

Table 3: Association between top dual psychiatric diagnoses, TTR and hemorrhage

|                                | N (%)       | Average % TTR | % with bleeds |
|--------------------------------|-------------|---------------|---------------|
| Anxiety-Depression             | 4,340 (4.2) | 55.8          | 5.9           |
| Depression-PTSD                | 4,285 (4.1) | 55.6          | 4.9           |
| Anxiety-PTSD                   | 1,628 (1.6) | 56.6          | 5.7           |
| Depression-Bipolar             | 1,312 (1.3) | 52.0          | 5.4           |
| Depression-Psychotic disorders | 807 (0.8)   | 52.4          | 6.9           |
| Anxiety-Bipolar                | 628 (0.6)   | 51.8          | 6.4           |

TTR: Percent Time in Therapeutic Range

Table 4: Association between the number of comorbid psychiatric diagnoses, TTR and hemorrhage

| # of concurrent mental health conditions | N (% of total population) | Average % TTR | % with bleeds |
|------------------------------------------|---------------------------|---------------|---------------|
| 1                                        | 18,406 (17.7)             | 58.1          | 5.6           |
| 2                                        | 7,485 (7.2)               | 56.0          | 5.4           |
| 3                                        | 1,973 (1.9)               | 54.0          | 5.4           |
| 4+                                       | 352 (0.3)                 | 50.5          | 5.9           |

TTR: Percent Time in Therapeutic Range

Table 5: Effect of GAF method on average percentage time in therapeutic range (TTR) distribution

| GAF Score         | (Lowest GAF method) |             | (Average GAF method) |             |
|-------------------|---------------------|-------------|----------------------|-------------|
|                   | N                   | Average TTR | N                    | Average TTR |
| Missing           | 14,588              | 58.3%*      | 14,588               | 58.3%*      |
| 71-100            | 439                 | 60.9%*      | 692                  | 60.5%*      |
| 51-70 (reference) | 6,759               | 57.3%       | 8,850                | 56.5%       |
| 31-50             | 6,067               | 54.3%*      | 3,979                | 54.0%*      |
| 0-30              | 363                 | 49.0%*      | 107                  | 50.5 %      |

\*P<0.05 (ANOVA)

GAF: Global Assessment of Function

Appendix 4: Cox regression of major hemorrhagic incidences among all patients, including beta coefficients for covariates not shown in the manuscript

|                             | All Patients |          | Only Patients with MHCs           |                             |
|-----------------------------|--------------|----------|-----------------------------------|-----------------------------|
|                             | Model 1:     | Model 2: | Model 3:<br>without<br>imputation | Model 4: with<br>imputation |
| Any mental health condition | 1.19†        |          |                                   | 1.12                        |
| GAF >50                     |              |          | 0.86                              | 1.00                        |
| GAF missing                 |              |          | 1.01                              |                             |
| Psychiatric hospitalization |              |          | 1.10                              | 1.12                        |
| Anxiety disorders           |              | 1.13*    | 1.12                              | 1.10                        |
| Bipolar disorder            |              | 1.10     | 1.11                              | 1.09                        |
| Depression                  |              | 1.16†    | 1.14                              | 1.12                        |
| PTSD                        |              | 1.01     | 1.00                              | 0.98                        |
| Schizophrenia               |              | 0.84     | 0.82                              | 0.82                        |
| Other psychotic disorders   |              | 1.25*    | 1.24*                             | 1.24*                       |
| Age <55                     | --           | --       | --                                |                             |
| Age 55-59                   | 1.16         | 1.17     | 1.14                              | 1.14                        |
| Age 60-64                   | 1.33*        | 1.34*    | 1.35*                             | 1.36*                       |
| Age 65-69                   | 1.91†        | 1.91†    | 1.87†                             | 1.87†                       |
| Age 70-74                   | 2.55†        | 2.55†    | 2.32†                             | 2.33†                       |
| Age ≥75                     | 3.33†        | 3.33†    | 3.00†                             | 3.04†                       |
| TTR 0-30                    | 2.48†        | 2.47†    | 2.24†                             | 2.24†                       |
| TTR 31-40                   | 1.91†        | 1.91†    | 1.59†                             | 1.59†                       |
| TTR 41-50                   | 1.66†        | 1.65†    | 1.58†                             | 1.58†                       |
| TTR 51-60                   | 1.39†        | 1.39†    | 1.40†                             | 1.39†                       |
| TTR 61-70                   | 1.16†        | 1.16†    | 1.12                              | 1.11                        |
| TTR >70                     | --           | --       | --                                | --                          |
| Hypertension                | 0.85†        | 0.85†    | 0.92                              | 0.92                        |
| Stroke history              | 1.43†        | 1.43†    | 1.44†                             | 1.44†                       |
| Chronic liver disease       | 1.74†        | 1.74†    | 2.20†                             | 2.21†                       |
| Chronic kidney disease      | 1.95†        | 1.95†    | 1.72†                             | 1.72†                       |
| Alcohol abuse               | 1.17*        | 1.17*    | 0.98                              | 0.98                        |
| Non-alcohol substance abuse | 1.22         | 1.20     | 1.15                              | 1.15                        |

MHC: Mental health condition; TTR: Percentage time in therapeutic range

\*p < 0.05 and † p < 0.001

Appendix 5: Comparison of prevalence of mental health conditions between our database of 103,987 prevalent users of warfarin in VA, 2006-8, and the prevalence of similar conditions in the 1999 Veterans' Large Health Survey. Percentages of the total population are given.

|                           | 1999 Large Health Survey | Current Study |
|---------------------------|--------------------------|---------------|
| Anxiety                   | 8.8                      | 7.8           |
| Bipolar Disorder          | 4.0                      | 2.3           |
| Depression                | 15.1                     | 18.8          |
| PTSD                      | 6.8                      | 7.3           |
| Schizophrenia             | 4.6                      | 1.1           |
| Other Psychotic Disorders | Not assessed             | 1.9           |

Note – In the Large Health Survey, patients self-reported these conditions, in response to a question such as, “Has a doctor or medical professional ever told you that you have --?”. Statistical tests were not possible, as we did not possess the raw data from the 1999 Large Health Survey<sup>20</sup>.

Appendix 6: Propensity score case-control match

| Variables                                   | Case (with MHCs)<br>(%) | Control (without MHCs)<br>(%) |
|---------------------------------------------|-------------------------|-------------------------------|
| Total                                       | 28,146                  | 28,146                        |
| Female Gender                               | 876 (3.1)               | 918 (3.3)                     |
| Age Group                                   |                         |                               |
| 20-54                                       | 3,359 (11.9)            | 3,335 (11.8)                  |
| 55-59                                       | 5,298 (18.8)            | 5,321 (18.9)                  |
| 60-64                                       | 4,488 (15.9)            | 4,544 (16.1)                  |
| 65-69                                       | 2,756 (9.8)             | 2,781 (9.9)                   |
| 70-74                                       | 3,416 (12.1)            | 3,361 (11.9)                  |
| 75+                                         | 8,829 (31.4)            | 8,804 (31.3)                  |
| Race/Ethnicity                              |                         |                               |
| Non-Hispanic White                          | 23,608 (83.9)           | 23,509 (83.5)                 |
| Non-Hispanic Black                          | 2,816 (10)              | 2,995 (10.6)                  |
| Hispanic                                    | 979 (3.5)               | 972 (3.5)                     |
| Asian                                       | 94 (0.3)                | 87 (0.3)                      |
| Native American                             | 139 (0.5)               | 84 (0.3)                      |
| Other/Unknown                               | 510 (1.8)               | 499 (1.8)                     |
| Percent Poverty, Quintiles                  |                         |                               |
| Wealthiest (0.0-5.9%)                       | 5,302 (18.8)            | 5,255 (18.7)                  |
| Wealthy (5.9-9.0%)                          | 5,631 (20)              | 5,523 (19.6)                  |
| Moderate (9.0-12.6%)                        | 5,661 (20.1)            | 5,742 (20.4)                  |
| Poor (12.6-17.8%)                           | 5,818 (20.7)            | 5,989 (21.3)                  |
| Poorest (17.8-100.0%)                       | 5,734 (20.4)            | 5,637 (20.0)                  |
| Driving Distance to Nearest VA, Quintiles   |                         |                               |
| Nearest (3.1 miles or closer)               | 5,657 (20.1)            | 5,497 (19.5)                  |
| Near (3.1 – 6.0 mi.)                        | 5,637 (20)              | 5,663 (20.1)                  |
| Moderate (6.0 – 10.5 mi.)                   | 5,652 (20.1)            | 5,724 (20.3)                  |
| Far (10.5 – 20.3 mi.)                       | 5,723 (20.3)            | 5,712 (20.3)                  |
| Farthest (20.3 mi. or farther)              | 5,477 (19.5)            | 5,550 (19.7)                  |
| Date of Warfarin Inception                  |                         |                               |
| >= 6 months before study inception          | 19,778 (70.3)           | 19,944 (70.9)                 |
| 6 months before study – First year of study | 7,080 (25.2)            | 7,011 (24.9)                  |
| Second year of the study                    | 1,288 (4.6)             | 1,191 (4.2)                   |
| Primary Indication for Warfarin‡            |                         |                               |
| Atrial Fibrillation                         | 15,787 (56.1)           | 15,979 (56.8)                 |
| Venous Thromboembolism                      | 9,941 (35.3)            | 9,729 (34.6)                  |
| All Others Combined                         | 2,418 (8.6)             | 2,438 (8.7)                   |
| Physical Comorbid Conditions                |                         |                               |
| Cancer (newly diagnosed)                    | 1,818 (6.5)             | 1,841 (6.5)                   |
| Chronic Kidney Disease                      | 1,983 (7)               | 2,031 (7.2)                   |
| Chronic Liver Disease                       | 314 (1.1)               | 362 (1.3)                     |
| Chronic Lung Disease                        | 7,397 (26.3)            | 7,241 (25.7)                  |

|                                                      |               |               |
|------------------------------------------------------|---------------|---------------|
| Coronary Artery Disease                              |               |               |
| Diabetes                                             | 11,281 (40.1) | 11,235 (39.9) |
| Epilepsy                                             | 909 (3.2)     | 925 (3.3)     |
| Heart Failure                                        | 7,933 (28.2)  | 7,927 (28.2)  |
| Hyperlipidemia                                       | 17,581 (62.5) | 17,620 (62.6) |
| Hypertension                                         | 20,895 (74.2) | 20,841 (74)   |
| Pain Disorders                                       | 17,833 (63.4) | 17,844 (63.4) |
| Peripheral Arterial Disease                          | 4,039 (14.4)  | 4,198 (14.9)  |
| Previous Stroke                                      | 6,129 (21.8)  | 6,358 (22.6)  |
| Mental Comorbid Conditions                           |               |               |
| Alcohol Abuse                                        | 1,998 (7.1)   | 1,927 (6.8)   |
| Dementia                                             | 1,053 (3.7)   | 1,108 (3.9)   |
| Substance Abuse (non-Alcohol)                        | 713 (2.5)     | 669 (2.4)     |
| Number of Non-Warfarin Medications                   |               |               |
| 0-7                                                  | 6,371 (22.6)  | 6,324 (22.5)  |
| 8-11                                                 | 9,144 (32.5)  | 9,184 (32.6)  |
| 12-15                                                | 7,238 (25.7)  | 7,232 (25.7)  |
| 16+                                                  | 5,393 (19.2)  | 5,406 (19.2)  |
| Number of Hospitalizations during Experienced Period |               |               |
| None                                                 | 17,851 (63.4) | 17,782 (63.2) |
| 1                                                    | 4,695 (16.7)  | 4,695 (16.7)  |
| 2                                                    | 2,371 (8.4)   | 2,457 (8.7)   |
| 3                                                    | 1,267 (4.5)   | 1,223 (4.3)   |
| 4+                                                   | 1,962 (7)     | 1,989 (7.1)   |
| Average Time in Therapeutic Range (SD)               | 57.2 (22.5)   | 57.2 (22.8)   |



Appendix 7: Nested linear regression models of the association between mental health conditions and percent time in therapeutic range, a measure of anticoagulation control (all covariates included; N=103,897)

| Variable                                    | Model 1 | Model 2 | Model 3 | Model 4 |
|---------------------------------------------|---------|---------|---------|---------|
| Intercept                                   | 63.06†  | 64.22†  | 66.35†  | 67.54†  |
| Model R <sup>2</sup>                        | 0.0168  | 0.0306  | 0.0532  | 0.0756  |
| <b>Mental Health Conditions</b>             |         |         |         |         |
| Anxiety disorders                           | -1.31†  | -1.18†  | -0.86†  | 0.18    |
| Bipolar disorder                            | -5.50†  | -4.55†  | -3.74†  | -2.63†  |
| Depression                                  | -5.06†  | -4.41†  | -3.54†  | -2.26†  |
| PTSD                                        | -2.22†  | -1.12†  | -0.68*  | -0.01   |
| Schizophrenia                               | -4.40†  | -2.22†  | -1.43*  | -0.36   |
| Other psychotic disorders                   | -5.59†  | -5.77†  | -4.51†  | -2.92†  |
| <b>Demographics</b>                         |         |         |         |         |
| Female Gender                               |         | -2.55†  | -3.17†  | -2.48†  |
| <b>Age Group</b>                            |         |         |         |         |
| 20-54                                       |         | -6.49†  | -6.71†  | -5.32†  |
| 55-59                                       |         | -2.88†  | -2.88†  | -1.69†  |
| 60-64                                       |         | -1.44†  | -1.42†  | -0.34   |
| 65-69                                       |         | 0.25    | 0.20    | 0.75†   |
| 70-74                                       |         | 0.58*   | 0.57*   | 0.87†   |
| 75+                                         |         |         |         |         |
| <b>Race/Ethnicity</b>                       |         |         |         |         |
| Non-Hispanic White                          |         |         |         |         |
| Non-Hispanic Black                          |         | -5.10†  | -4.54†  | -3.48†  |
| Others                                      |         | -1.17†  | -1.20†  | -0.83*  |
| <b>Physical Comorbid Conditions</b>         |         |         |         |         |
| Cancer (newly diagnosed)                    |         |         | -5.22†  | -3.79†  |
| Chronic Kidney Disease                      |         |         | -5.29†  | -3.98†  |
| Chronic Liver Disease                       |         |         | -4.94†  | -3.04†  |
| Chronic Lung Disease                        |         |         | -2.69†  | -0.58†  |
| Diabetes                                    |         |         | -1.60†  | -0.63†  |
| Epilepsy                                    |         |         | -2.69†  | -1.40*  |
| Heart Failure                               |         |         | -2.44†  | -0.66†  |
| Hypertension                                |         |         | 0.96†   | 2.00†   |
| Prior Stroke                                |         |         | -0.53*  | -0.67†  |
| <b>Mental Comorbid Conditions</b>           |         |         |         |         |
| Alcohol Abuse                               |         |         | -8.22†  | -7.64†  |
| Dementia                                    |         |         | -4.25†  | -3.07†  |
| Substance Abuse (non-Alcohol)               |         |         | -4.25†  | -3.08†  |
| <b>Date of Warfarin Inception</b>           |         |         |         |         |
| >= 6 months before study inception          |         |         |         |         |
| 6 months before study – First year of study |         |         |         | -3.52†  |
| Second year of the study                    |         |         |         | -6.20†  |
| <b>Primary Indication for Warfarin‡</b>     |         |         |         |         |
| Atrial Fibrillation                         |         |         |         |         |
| Venous Thromboembolism                      |         |         |         | -1.11†  |
| All Others Combined                         |         |         |         | -1.05†  |

|                                                      |  |  |  |        |
|------------------------------------------------------|--|--|--|--------|
| Number of Non-Warfarin Medications                   |  |  |  |        |
| 0-7                                                  |  |  |  |        |
| 8-11                                                 |  |  |  | -2.12† |
| 12-15                                                |  |  |  | -3.70† |
| 16+                                                  |  |  |  | -5.56† |
| Number of Hospitalizations during Experienced Period |  |  |  |        |
| None                                                 |  |  |  |        |
| 1                                                    |  |  |  | -3.74† |
| 2                                                    |  |  |  | -4.82† |
| 3                                                    |  |  |  | -6.03† |
| 4+                                                   |  |  |  | -8.45† |
